# Supplementary material
Source: publisher figshare collection journal article supplement (https://acs.figshare.com/ndownloader/files/31329551)
Supplement: Supplementary file 1 [file 31329551]

**Interfacial Defect Passivation and Charge Carrier Management for Efficient  
Perovskite Solar Cells via Highly Crystalline Polymer**

Rongmei Zhao,<sup>a</sup> Lin Xie,<sup>a,\*</sup> Rongshan Zhuang,<sup>a</sup> Tai Wu,<sup>a</sup> Rongjun Zhao,<sup>a</sup> Linqin  
Wang,<sup>b</sup> Licheng Sun,<sup>b</sup> Yong Hua<sup>a,\*</sup>

<sup>a</sup> Yunnan Key Laboratory for Micro/Nano Materials & Technology, School of  
Materials and Energy, Yunnan University, Kunming 650091, China.

<sup>b</sup> Center of Artificial Photosynthesis for Solar Fuels, School of Science, Westlake  
University, Hangzhou 310024, China.

## Experimental Section

### *Materials.*

Fluorine doped tin oxide (FTO) coated glass substrates, TiO<sub>2</sub> paste, Acetylacetone, Titanium diisopropoxide bis(acetylacetonate) 75% in Isopropyl Alcohol, N, N'-dimethylformamide (DMF), dimethyl sulfoxide (DMSO), 4-tert-butylpyridine (tBP), bis(trifluoromethylsulfonyl)imide lithium salt (LiTFSI), Tris(2-(1Hpyrazol-1-yl)-4-tert-butylpyridine)-cobalt(III) tris(bis(trifluoromethylsulfonyl) imide) (FK 209), chlorobenzene (CB), acetonitrile (ACN), 2,7-dioctyl[1]benzothieno[3,2-b][1]benzothiophene (C8-BTBT), were purchased from Sigma-aldrich. N<sup>2</sup>, N<sup>2</sup>, N<sup>2'</sup>, N<sup>2'</sup>, N<sup>7</sup>, N<sup>7</sup>, N<sup>7'</sup>, N<sup>7'</sup>-octakis(4-methoxyphenyl)-9, 9'-spirobi[9H-fluorene]-2, 2', 7, 7'-tetramine (Spiro-OMeTAD), Cesium iodide (CsI), formamidiniumiodide (FAI), and methylammonium bromide (MABr) were supplied from greatcell. Lead iodide (PbI<sub>2</sub>) and lead bromide (PbBr<sub>2</sub>) were purchased from TCI Chemicals. All materials were used as received without further purification.

### *Film and device Fabrication.*

Laser patterned FTO substrates (7 Ω per square) were ultrasonically cleaned with running water, detergent, ethanol, and acetone for 20 min in sequence. After drying, a compact TiO<sub>2</sub> layer was deposited on the cleaned FTO glass by spray pyrolysis from a precursor solution of 0.6 mL titanium diisopropoxide bis(acetylacetonate) and 0.4 mL acetylacetonate in 9 mL anhydrous ethanol. After sintering, a mesoporous TiO<sub>2</sub> layer was spin-coated onto the TiO<sub>2</sub> compact layer at 5000 rpm for 20 s, and sintered again. Then, all substrates were transferred to a nitrogen-filled glovebox for perovskite deposition. (FAPbI<sub>3</sub>)<sub>0.875</sub>(MAPbBr<sub>3</sub>)<sub>0.075</sub>(CsPbI<sub>3</sub>)<sub>0.05</sub>(PbI<sub>2</sub>)<sub>0.03</sub> perovskite precursor solution was prepared by dissolving 1.30 M PbI<sub>2</sub>, 1.19 M FAI, 0.14 M PbBr<sub>2</sub>, 0.14 M MABr, and 0.07 M CsI into the DMSO/DMF (1/4 v/v) mixture. The perovskite film was deposited by a consecutively spin-coating process at 2000 rpm for 10 s and 6000 rpm for 30 s on the surface of TiO<sub>2</sub> layer. At the time of 15 s prior to the program end, 100 μL of chlorobenzene was dripped on the spinning substrate, and the film was then annealed at 120°C for 1 h. The target devices were obtained by spin-coating different

concentrations (1, 2, 5, 10, 15 40 mg mL<sup>-1</sup>, dissolved in chlorobenzene) of C8-BTBT polymer at 4500 rpm for 30 s. Subsequently, the Spiro-OMeTAD was spin-coated onto the perovskite/C8-BTBT films at 4500 rpm for 30 s using 69.36 mM of Spiro-OMeTAD in CB with additives of 28.8  $\mu$ L *t*-BP, 17.8  $\mu$ L LiTFSI (520 mg mL<sup>-1</sup> in ACN), 6.5  $\mu$ L FK209 (300 mg mL<sup>-1</sup> in ACN). Finally, a gold layer was thermally evaporated under a lower vacuum ( $\leq 2 \times 10^{-4}$  Pa) to complete the device fabrication.

#### *Film and device characterizations.*

The UV-vis absorption spectra were recorded by a spectrophotometer (UV-2600, Shimadzu). The Normalized differential pulse voltammetry (DPV) was measured by Electrochemical Workstation (Zennium X, Zahner). Current density-voltage characteristics were measured under 100 mW cm<sup>-2</sup> (AM 1.5G illumination) using a Newport solar simulator (model 91160) and a Keithley 2400 source/meter. The external quantum efficiency (EQE) spectra were recorded using a computer-controlled setup consisting of a Xenon light source (Spectral Products ASB-XE-175), a monochromator (Spectra Products CM110), and a potentiostat (LabJack U6 DAQ board), calibrated by a certified reference solar cell (Fraunhofer ISE). The steady-state photoluminescence (PL) measurement was performed using a spectrometer (FLS1000, Edinburgh Instruments). The time-resolved PL (TRPL) decay transients were measured using a picosecond pulse diode laser (EPL-470). Nanosecond transient absorption (TA) spectroscopy was investigated by a spectrometer (LP980, Edinburgh Instruments). The space-charge limited current (SCLC) measurements were performed by collecting the *I*-*V* characteristics of devices in dark conditions. The surface morphology of films was characterized by scanning electron microscopy (SEM) and atomic force microscope (AFM) with the tapping mode. X-ray diffraction (XRD) patterns of films were measured with a TTR-18KW diffractometer, with Cu K $\alpha$  radiation ( $\lambda = 0.15405$  nm) operated at 10000 W power (40 kV, 250 mA). X-ray photoelectron spectroscopy (XPS) was performed using a scanning XPS microprobe (K $\alpha$  Alpha<sup>+</sup>). Femtosecond transient absorption (fs-TA) measurements were performed for the films by using a multipass

amplified Ti: sapphire laser (800 nm laser pulses with a 3.5 mJ/pulse; pulse width of ~120 fs with a repetition rate of 2 kHz, Astrella from Coherent; the detection time delay is in the range of 8.5 ns in conjunction with Helios spectrometers. Excitation pump pulses were generated after passing through a fraction of the 800 nm beam into a spectrally tunable (240–2600 nm) optical parametric amplifier (Newport Spectra-Physics). The probe pulses (UV-Visible and NIR wavelength continuum, white light) were generated by passing another fraction of the 800 nm pulses through a 2 mm thick calcium fluoride (CaF<sub>2</sub>) crystal. All the fs-TA experiments were performed under identical ambient conditions at room temperature. Grazing-incidence wide-angle X-ray scattering (GIWAXS) was performed on a Duo microsources single-crystal X-ray diffractometer (Bruker D8 Venture) with Photon III detector and Cu-Diamond X-ray sources ( $\lambda = 1.5406 \text{ \AA}$ ). The data reduction was processed using APEX3 software. The Fourier-transform infrared spectroscopy (FTIR) spectroscopy was carried out using Nicolet iS10 (Thermo Fisher). The Raman spectroscopy was measured by Confocal Raman Microscope (InVia, Renishaw). A Mettler heating stage (FP 82 HT) was used for polarizing optical microscopy (POM, Optiphot 2, Nikon) and DSC were recorded with a DSC 200 F3 Maia calorimeter (NETZSCH) at 10 K min<sup>-1</sup>.

## SCLC measurement

### *Hole mobility*

Fluorine doped tin oxide (FTO) glass was patterned via laser etching for the fabrication of a hole-only device. The clean FTO glasses were cleaned by ozone treatment again. The PEDOT:PSS layer was spin-coated onto the substrate at 4000 rpm for 30s and annealed at 170°C for 20 min in air. After cooling, the glasses were transferred to the nitrogen-filled glovebox. A film of C8-BTBT, Spiro-OMeTAD and Spiro-C8 was spun at 4500 rpm for 30 s, respectively. The gold layer was finally evaporated density-voltage ( $J$ - $V$ ) curve of a hole-only device was measured with a Keithley 2400 source-measure unit in a nitrogen-filled glovebox.

The hole mobility was derived by fitting  $J$ - $V$  curve with Mott-Gurney equation<sup>1</sup>:

$$J = \frac{9}{8} \varepsilon_0 \varepsilon_r \mu \frac{V^2}{L^3}$$

where  $J$  is the current density.  $\varepsilon_0$  is the vacuum permittivity.  $\varepsilon_r$  is the relative dielectric constant of the material.  $\mu$  is the hole mobility.  $L$  is the thickness of the hole transport layer.  $V$  is the applied voltage.

#### *Trap density*

The measurement of the trap density ( $n_{trap}$ ) is the same as the above method with the structure of 1) “hole only” device: FTO/PEDOT:PSS/perovskite/HTM/Au; 2) “electron only” device: FTO/PCBM/perovskite/PCBM/Au. The  $n_{trap}$  was estimated using the following equation<sup>2</sup>:

$$n_{trap} = \frac{2\varepsilon\varepsilon_0 V_{TFL}}{eL^2}$$

where,  $V_{TFL}$  is the trap-filled limit (TFL) voltage,  $\varepsilon$  is the dielectric constant of the perovskite layer.  $\varepsilon_0$  is the vacuum permittivity.  $e$  is the charge.  $L$  is the thickness of the perovskite layer.

#### *TRPL analysis*

The TPRL results are fitted through the biexponential equation as below:

$$f(t) = A_1 \exp\left(\frac{-t}{\tau_1}\right) + A_2 \exp\left(\frac{-t}{\tau_2}\right)$$

And the average value of lifetime ( $\tau_{ave.}$ ) is calculated by the following equation:

$$\tau_{ave.} = \frac{A_1 * \tau_1^2 + A_2 * \tau_2^2}{A_1 * \tau_1 + A_2 * \tau_2}$$

$\tau_1$  and  $\tau_2$  represent the fast and slow decay times, which are derived from the charge carriers quenching and the radiative recombination, respectively<sup>3-4</sup>.

#### *TA analysis*

The TA results are fitted with the biexponential decay function as below:

$$y = A_1 \exp\left(\frac{-t}{\tau_1}\right) + A_2 \exp\left(\frac{-t}{\tau_2}\right) + y_0$$

And the average value of lifetime ( $\tau_{ave.}$ ) is calculated by the following equation:

$$\tau_{ave.} = \frac{A_1 * \tau_1^2 + A_2 * \tau_2^2}{A_1 * \tau_1 + A_2 * \tau_2}$$

$\tau_1$  and  $\tau_2$  represent the fast and slow decay times.<sup>5</sup>

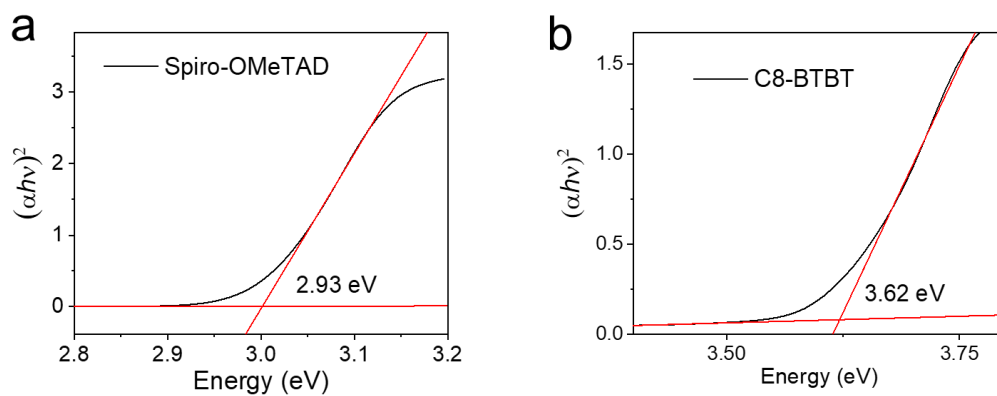

Figure S1. Tauc plots of different solutions in  $\text{CH}_2\text{Cl}_2$ , a) Spiro-OMeTAD and b) C8-BTBT.

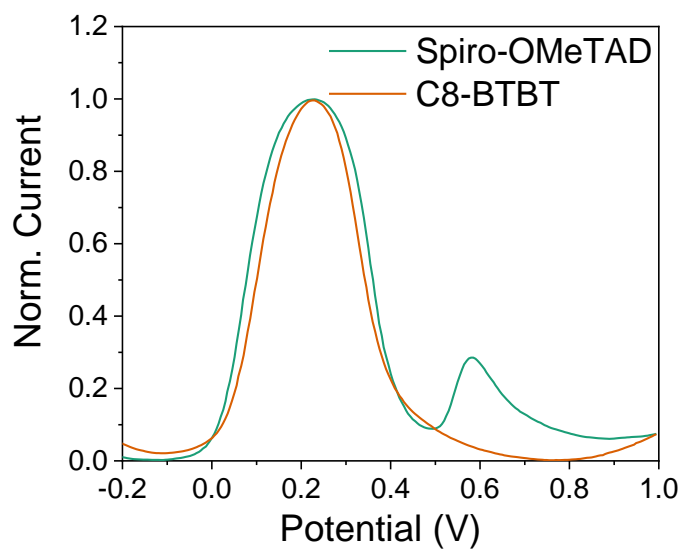

Figure S2. Normalized differential pulse voltammetry (DPV) spectra of Spiro-OMeTAD and C8-BTBT solution in  $\text{CH}_2\text{Cl}_2$ .

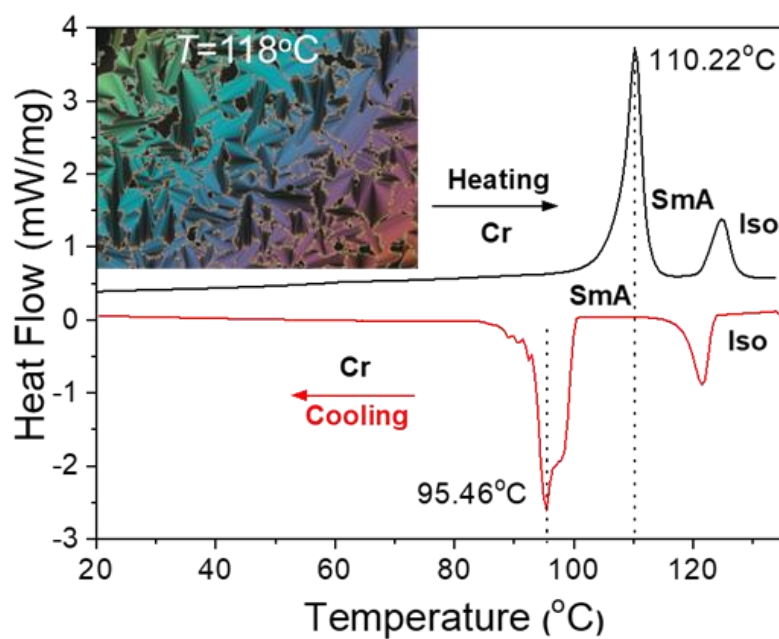

Figure S3. DSC heating and cooling scans (10 K min<sup>-1</sup>) of bare C8-BTBT powder. Cr = crystalline solid; SmA = Smectic phase; Iso = isotropic liquid state. (Insert: POM textures of smectic liquid crystal under the cross polarizer).

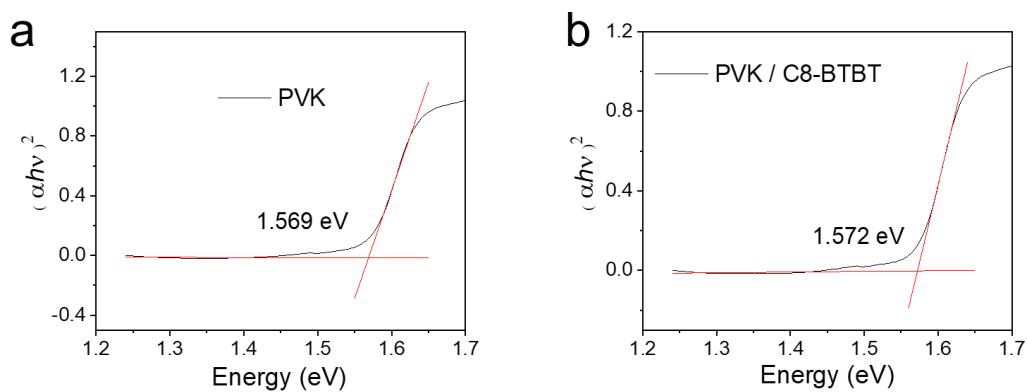

Figure S4. Tauc plots of a) perovskite film and b) perovskite/C8-BTBT film.

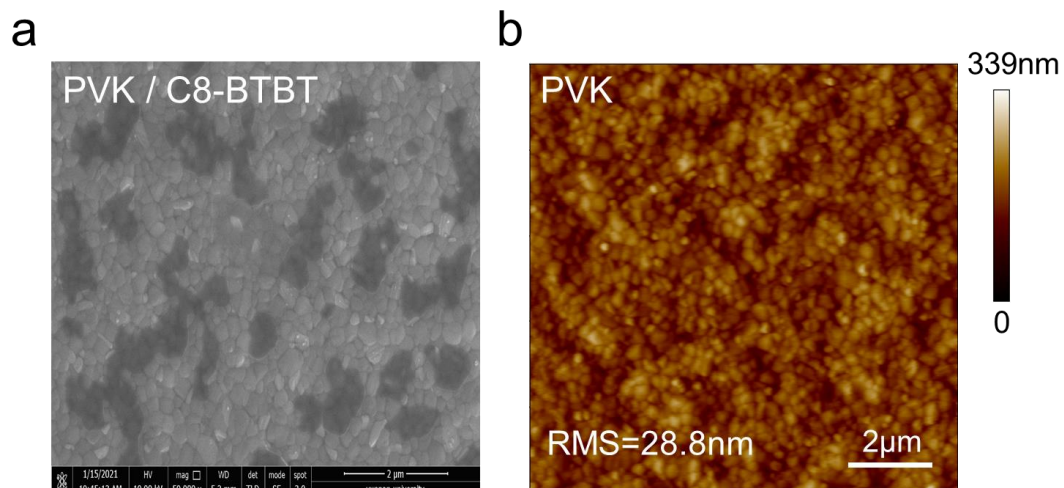

Figure S5. a) The SEM image of C8-BTBT on the surface of perovskite film, b) AFM image of bare perovskite film.

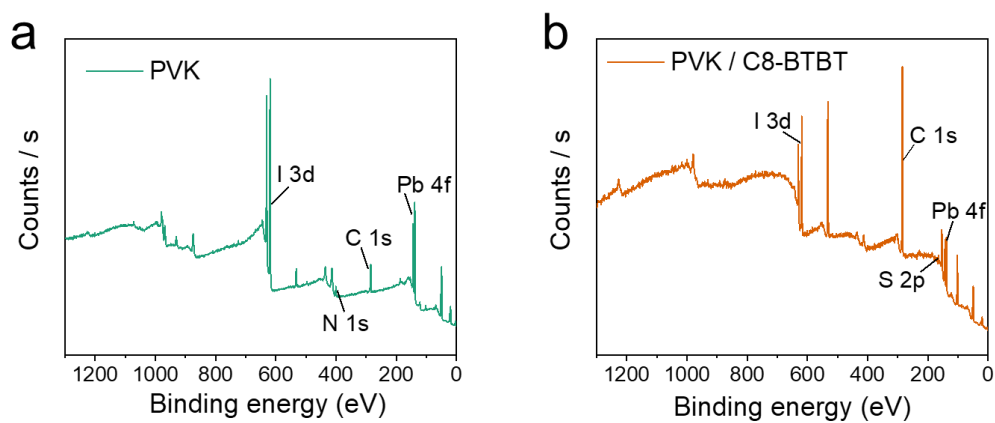

Figure S6. Full XPS spectra of a) perovskite film, b) C8-BTBT prepared on perovskite film.



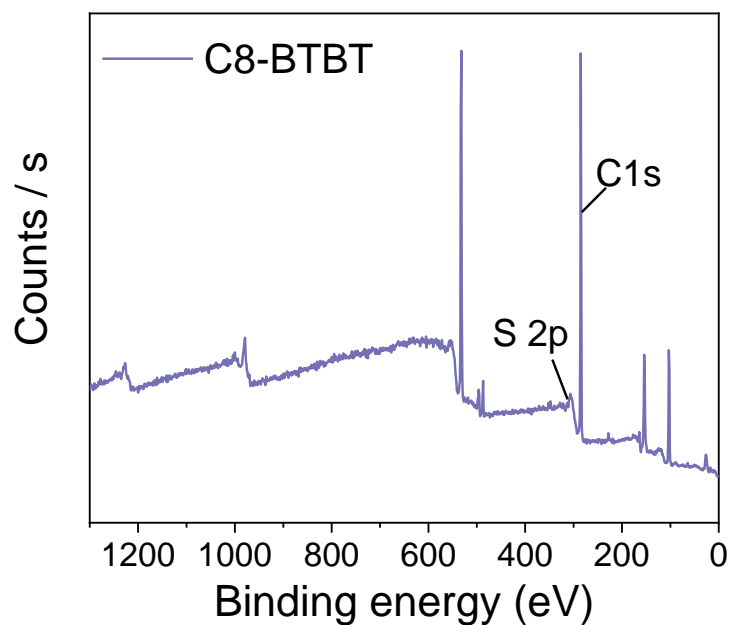

Figure S7. Full XPS spectra of bare C8-BTBT film.

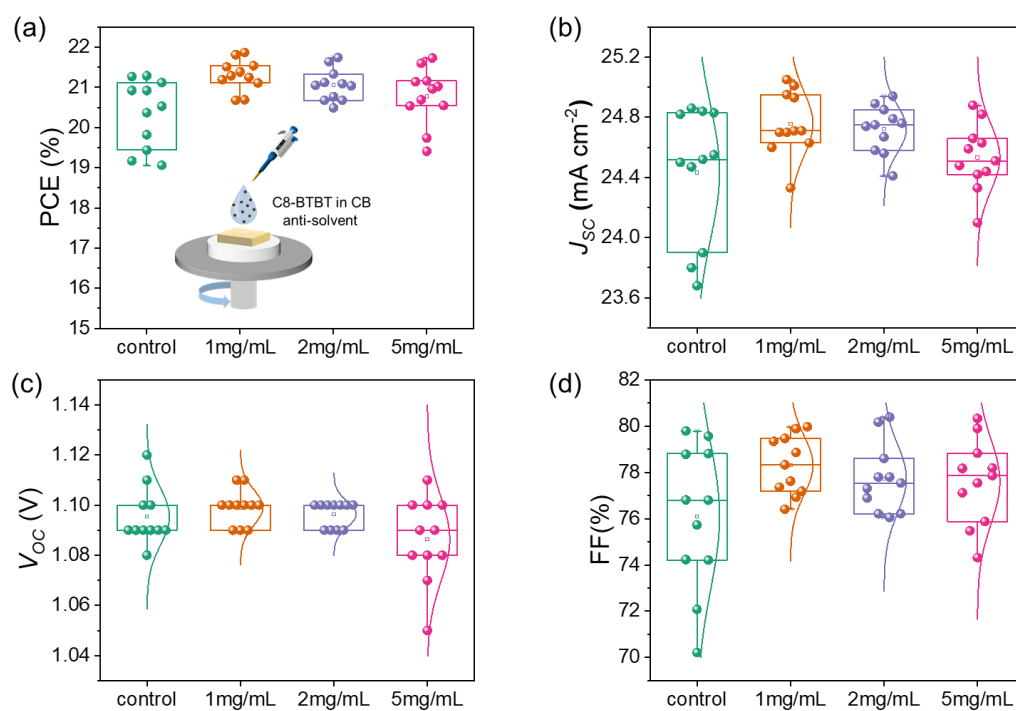

Figure S8. Statistics on photovoltaic parameters of a) PCE, b)  $J_{SC}$ , c)  $V_{OC}$  and d) FF depending on the various concentration of C8-BTBT anti-solvent modified devices.

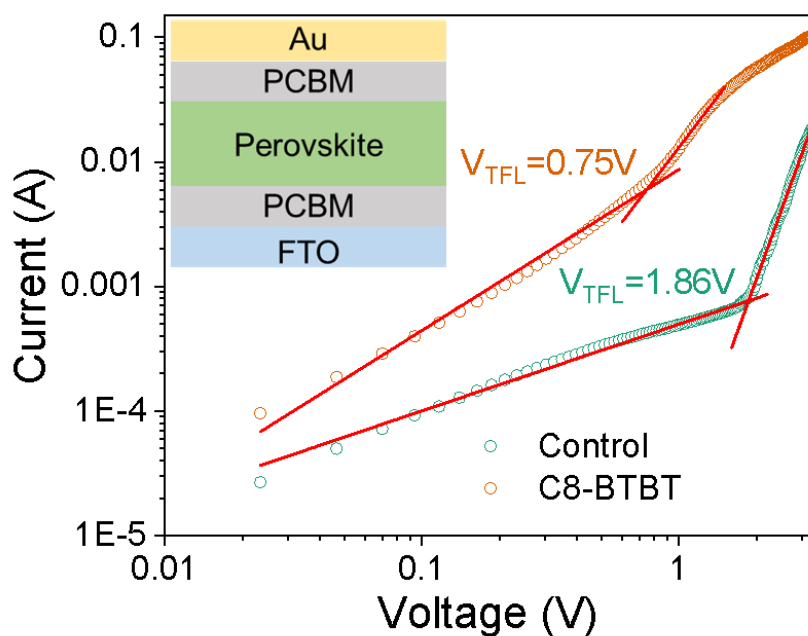

Figure S9. Dark  $J$ - $V$  curves of control and C8-BTBT antisolvent modified devices.

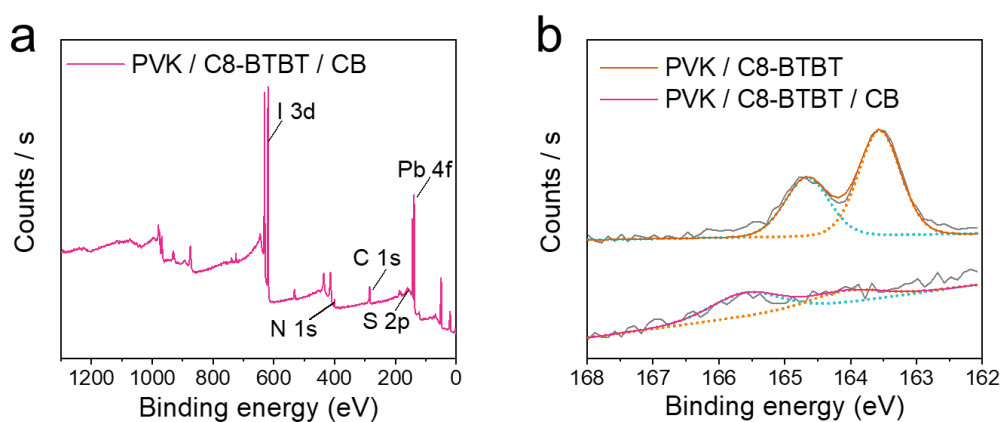

Figure S10. a) Full XPS spectra of C8-BTBT modified perovskite film washed by pure CB solvent, and b) XPS core-level spectra of S 2p in C8-BTBT modified perovskite film with and without CB washing.

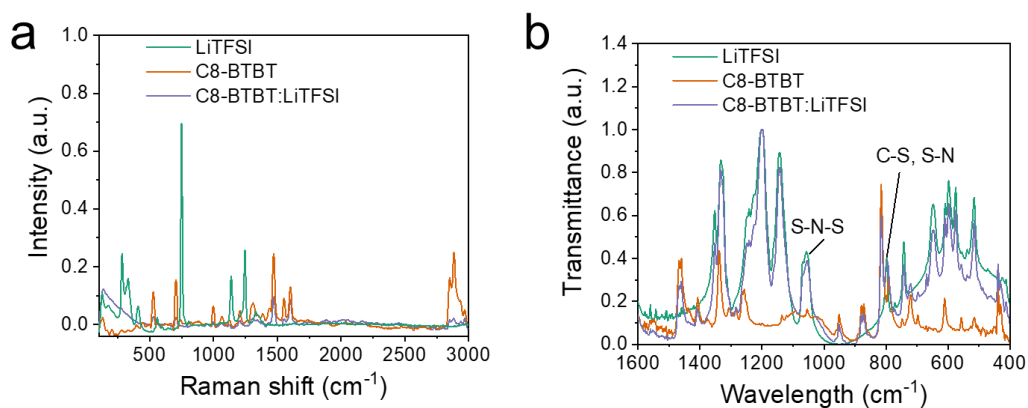

Figure S11. a) Raman Spectra and b) FTIR spectra of the mixture of C8-BTBT and LiTFSI, LiTFSI and C8-BTBT powders, respectively.

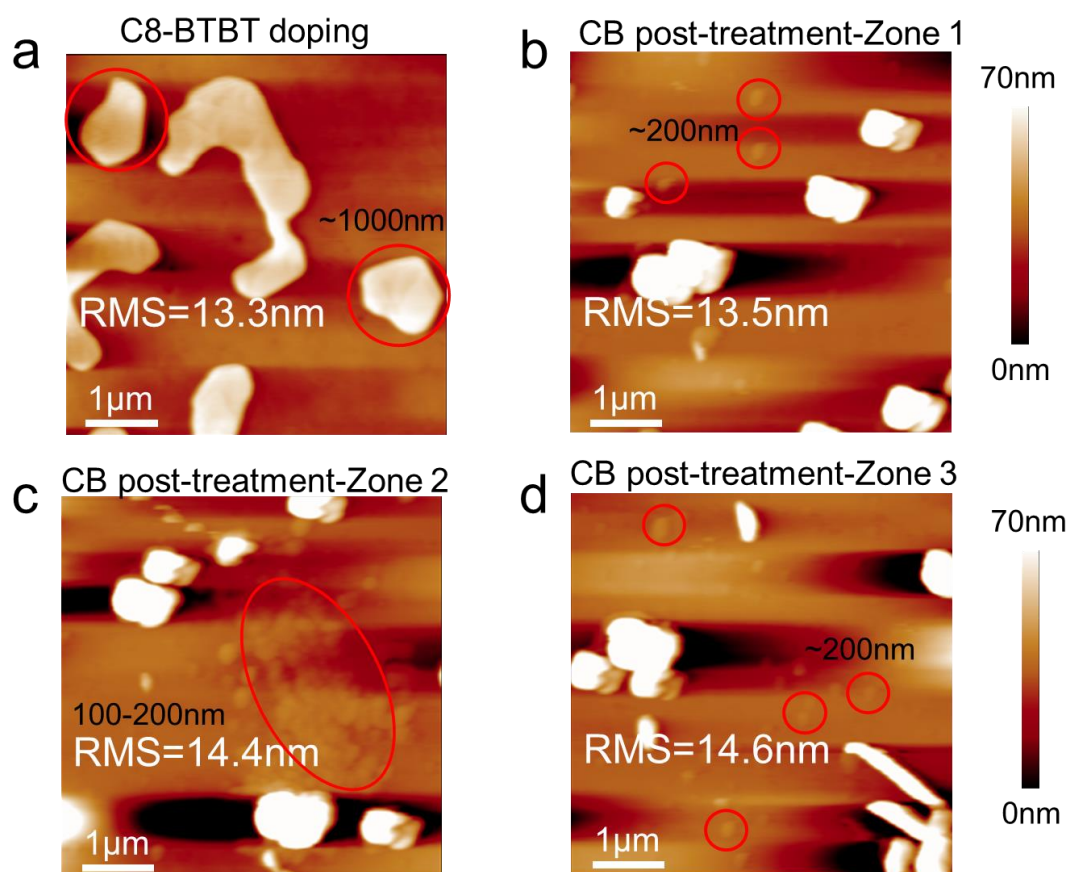

Figure S12. AFM image of a) C8-BTBT doped Spiro-OMeTAD film, b-d) AFM images of C8-BTBT doped Spiro-OMeTAD film in different areas after CB post-treatment.

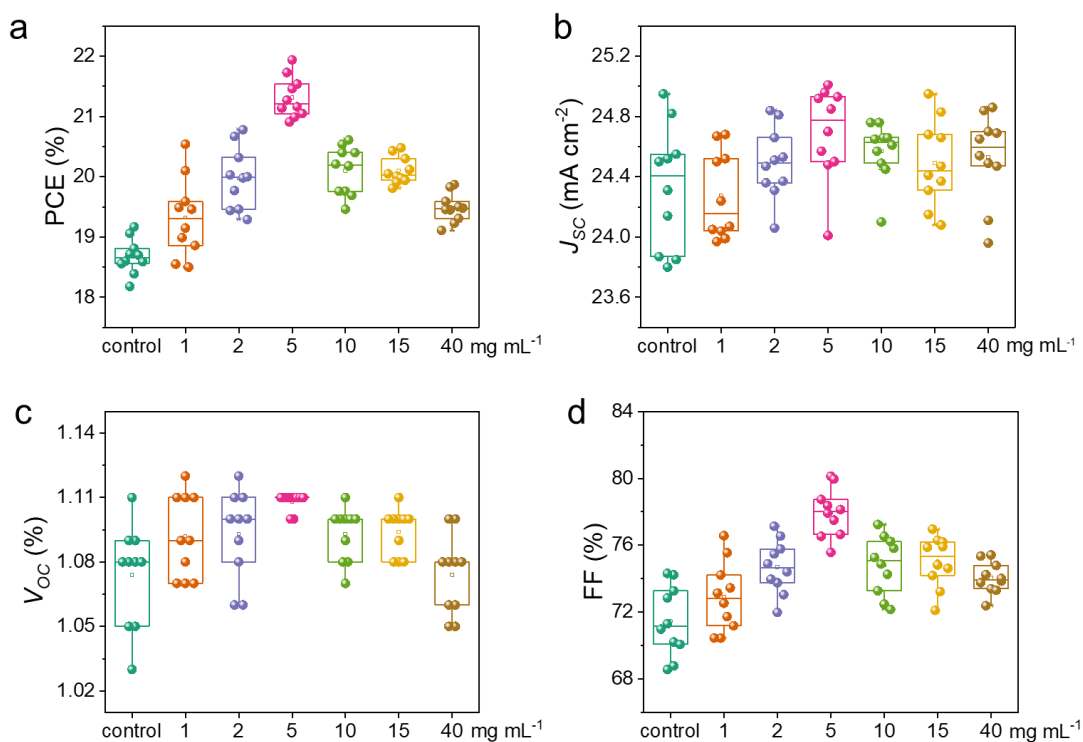

Figure S13. Statistics on photovoltaic parameters of (a) PCE, (b)  $J_{sc}$ , (c)  $V_{oc}$ , and (d) FF modified with and without various concentrations of C8-BTBT based on 10 devices.

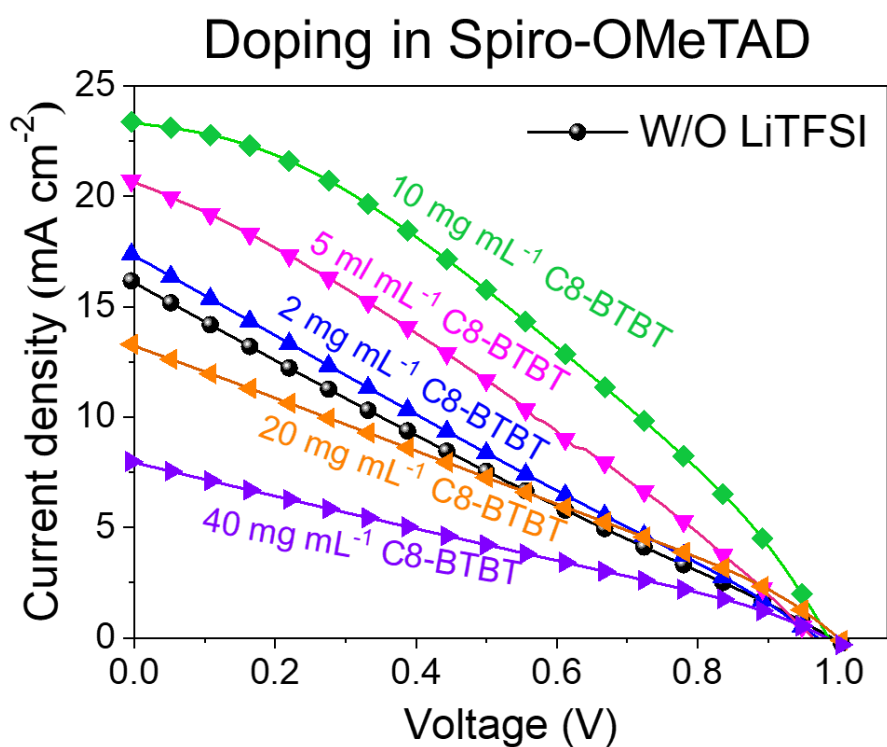

Figure S14. The current density-voltage ( $J-V$ ) curves of the devices with different concentrations of C8-BTBT doped Spiro-OMeTAD (without LiTFSI dopants).

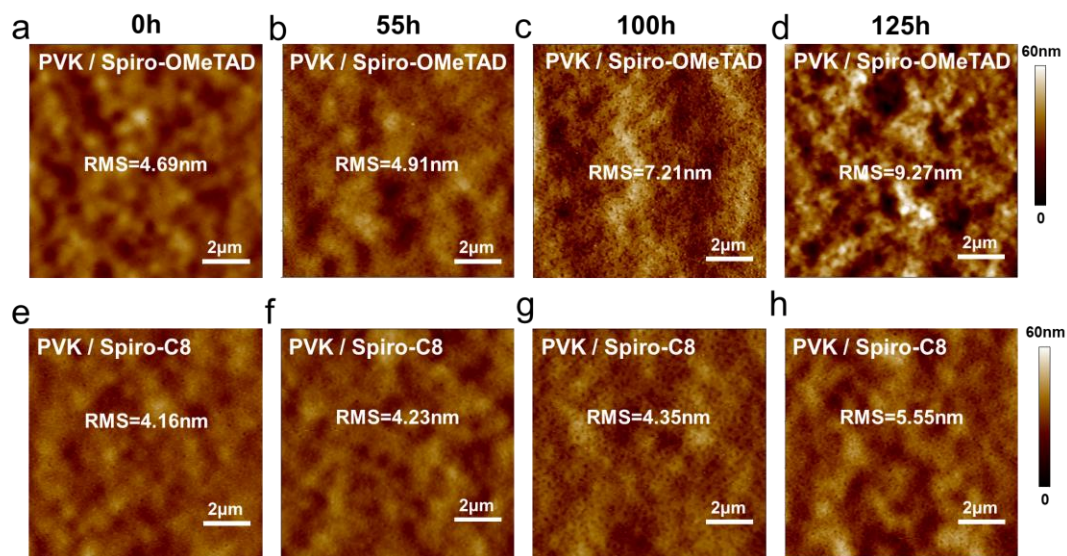

Figure S15. The AFM images of (a-d) Spiro-OMeTAD and (e-h) Spiro-C8 on top of perovskite films at 65°C in different periods.

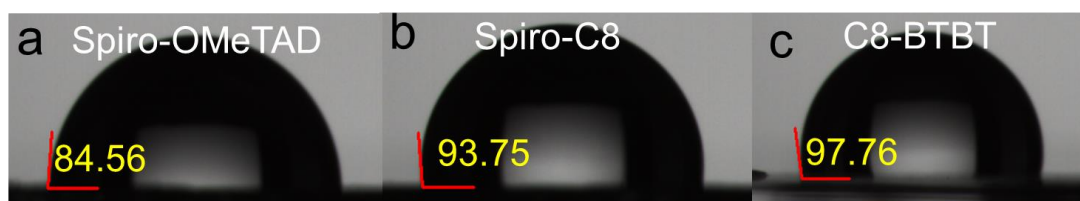

Figure S16. The water contact angle measurement of Spiro-OMeTAD, Spiro-C8 and C8-BTBT on perovskite films, respectively.

Table S1. Fitted results of TRPL decay curves in Figure 2f.

| Films                    | $A_1$ | $\tau_1$ (ns) | $A_2$ | $\tau_2$ (ns) | $\tau_{ave.}$ (ns) |
|--------------------------|-------|---------------|-------|---------------|--------------------|
| Glass/perovskite         | 0.76  | 12.9          | 0.24  | 242.9         | 209.2              |
| Glass/perovskite/C8-BTBT | 0.95  | 5.3           | 0.05  | 353.2         | 279.2              |

Table S2. The corresponding photovoltaic parameters (reverse scan) for the control and C8-BTBT-antisolvent modified devices (two-step), measured under AM 1.5 illumination.

| Device                | $J_{sc}$<br>(mA cm <sup>-2</sup> ) | $V_{oc}$<br>(V) | FF<br>(%)    | PCE<br>(%)   |
|-----------------------|------------------------------------|-----------------|--------------|--------------|
| Control               | 24.43 ± 0.44                       | 1.09 ± 0.011    | 76.09 ± 3.15 | 20.35 ± 0.85 |
| 1mg mL <sup>-1</sup>  | 24.76 ± 0.21                       | 1.10 ± 0.007    | 78.31 ± 1.27 | 21.30 ± 0.38 |
| 2 mg mL <sup>-1</sup> | 24.72 ± 0.15                       | 1.09 ± 0.005    | 77.72 ± 1.49 | 21.06 ± 0.39 |
| 5 mg mL <sup>-1</sup> | 24.53 ± 0.22                       | 1.09 ± 0.016    | 77.60 ± 1.83 | 20.78 ± 0.70 |

Table S3. Fitted results of TRPL decay curves in Figure 3b for perovskite, perovskite/Spiro-OMeTAD, perovskite/Spiro-C8 films on FTO/TiO<sub>2</sub> surface, respectively.

| Films                   | A <sub>1</sub> | $\tau_1$ (ns) | A <sub>2</sub> | $\tau_2$ (ns) | $\tau_{ave.}$ (ns) |
|-------------------------|----------------|---------------|----------------|---------------|--------------------|
| perovskite              | 0.28           | 4.4           | 0.72           | 122.5         | 120.9              |
| perovskite/Spiro-OMeTAD | 0.70           | 3.1           | 0.30           | 37.6          | 31.9               |
| perovskite/Spiro-C8     | 0.80           | 3.3           | 0.20           | 37.8          | 28.7               |

Table S4. The average photovoltaic parameters of devices modified with C8-BTBT and without C8-BTBT based on 10 devices for each sample.

| Device                 | $J_{SC}$<br>(mA cm <sup>-2</sup> ) | $V_{OC}$<br>(V) | FF<br>(%)    | PCE<br>(%)   |
|------------------------|------------------------------------|-----------------|--------------|--------------|
| Control                | 24.33 ± 0.41                       | 1.07 ± 0.024    | 71.46 ± 2.12 | 18.68 ± 0.29 |
| 1 mg mL <sup>-1</sup>  | 24.27 ± 0.29                       | 1.09 ± 0.019    | 72.93 ± 2.08 | 19.32 ± 0.65 |
| 2 mg mL <sup>-1</sup>  | 24.49 ± 0.24                       | 1.09 ± 0.021    | 74.70 ± 1.59 | 19.97 ± 0.51 |
| 5 mg mL <sup>-1</sup>  | 24.69 ± 0.31                       | 1.11 ± 0.004    | 77.95 ± 1.46 | 21.32 ± 0.34 |
| 10 mg mL <sup>-1</sup> | 24.57 ± 0.19                       | 1.09 ± 0.013    | 74.82 ± 1.74 | 20.10 ± 0.40 |
| 15 mg mL <sup>-1</sup> | 24.49 ± 0.28                       | 1.09 ± 0.011    | 75.02 ± 1.53 | 20.10 ± 0.23 |
| 40 mg mL <sup>-1</sup> | 24.53 ± 0.29                       | 1.07 ± 0.018    | 74.05 ± 0.95 | 19.48 ± 0.24 |

Table S5. Optimal photovoltaic parameters of the PSCs devices with different concentrations of C8-BTBT doped Spiro-OMeTAD (without LiTFSI dopants).

| Device                 | $J_{SC}$<br>(mA cm <sup>-2</sup> ) | $V_{OC}$<br>(V) | FF<br>(%) | PCE<br>(%) |
|------------------------|------------------------------------|-----------------|-----------|------------|
| W/O LiTFSI             | 19.47                              | 0.99            | 19.58     | 3.78       |
| 2 mg mL <sup>-1</sup>  | 20.55                              | 0.97            | 21.00     | 4.19       |
| 5 mg mL <sup>-1</sup>  | 22.41                              | 0.96            | 27.09     | 5.85       |
| 10 mg mL <sup>-1</sup> | 23.69                              | 0.99            | 34.13     | 7.97       |
| 20 mg mL <sup>-1</sup> | 15.45                              | 1.00            | 23.74     | 3.67       |
| 40 mg mL <sup>-1</sup> | 9.51                               | 0.98            | 22.68     | 2.12       |

## References

1. Rodriguez-Seco, C.; Mendez, M.; Roldan-Carmona, C.; Cabau, L.; Asiri, A. M.; Nazeeruddin, M. K.; Palomares, E., Benzothiadiazole Aryl-amine Based Materials as Efficient Hole Carriers in Perovskite Solar Cells. *ACS Appl Mater Interfaces* **2020**, *12*, 32712-32718.
2. Hu, X.; Wang, H.; Wang, M.; Zang, Z., Interfacial defects passivation using fullerene-polymer mixing layer for planar-structure perovskite solar cells with negligible hysteresis. *Solar Energy* **2020**, *206*, 816-825.
3. Chen, J.; Zhang, C.; Liu, X.; Peng, L.; Lin, J.; Chen, X., Carrier dynamic process in all-inorganic halide perovskites explored by photoluminescence spectra. *Photonics Res.* **2021**, *9*, 151-170.
4. Jiang, T.; Chen, Z.; Chen, X.; Chen, X.; Xu, X.; Liu, T.; Bai, L.; Yang, D.; Di, D.; Sha, W. E. I.; Zhu, H.; Yang, Y. M., Power Conversion Efficiency Enhancement of Low-Bandgap Mixed Pb–Sn Perovskite Solar Cells by Improved Interfacial Charge Transfer. *ACS Energy Lett.* **2019**, *4*, 1784-1790.
5. Yu, W.; Li, F.; Wang, H.; Alarousu, E.; Chen, Y.; Lin, B.; Wang, L.; Hedhili, M. N.; Li, Y.; Wu, K.; Wang, X.; Mohammed, O. F.; Wu, T., Ultrathin Cu<sub>2</sub>O as an efficient inorganic hole transporting material for perovskite solar cells. *Nanoscale* **2016**, *8*, 6173-6179.
